# Supplementary material for: A new reference material for O–Sr isotope determination in epidote using a micro-beam
Source: Royal Society of Chemistry journal article supplement (doi:10.1039/d3ja00038a), 2023-01-01
Supplement: d3ja00038a1.xlsx [file d3ja00038a1.xlsx]

## Sheet: Major Element
Table S1-1 The representative compositions of PSV epidote (Oxide concentrations in wt%)
Sample	Na2O	SiO2	La2O3	K2O	MgO	Ce2O3	CaO	Al2O3	MnO	TiO2	FeO	Total	Fs
PSV 01	0	39.101	0.028	0	0.06	0.056	24.059	26.723	0.05	0.065	7.663	97.805	0.173044
PSV 02	0.007	38.795	0.023	0	0.072	0.091	23.705	25.193	0.049	0	9.302	97.237	0.21225
PSV 03	0	39.211	0	0	0.048	0.041	23.905	26.371	0.025	0.024	7.606	97.231	0.173875
PSV 04	0	38.905	0	0	0.06	0.08	23.853	26.037	0.056	0.1	8.438	97.529	0.191258
PSV 05	0	38.84	0.05	0	0.04	0.041	23.763	25.8	0.076	0.051	8.346	97.007	0.190977
PSV 06	0	39.244	0	0	0.091	0	24.03	26.29	0.058	0.043	8.248	98.004	0.18629
PSV 07	0.014	39.495	0	0	0.063	0.018	23.764	26.765	0.055	0.115	7.641	97.93	0.172409
PSV 08	0	39.134	0	0.002	0.06	0.087	23.756	26.135	0.027	0.054	8.277	97.532	0.187723
PSV 09	0.009	39.108	0	0.009	0.033	0.025	23.845	26.426	0.087	0.059	7.691	97.292	0.175176
PSV 10	0.022	39.328	0.025	0.012	0.056	0.046	23.773	26.596	0.049	0.092	7.806	97.805	0.176397
PSV 11	0.03	39.4	0.005	0.006	0.053	0	23.842	26.728	0.091	0.021	7.545	97.721	0.170809
PSV 12	0.013	38.945	0.025	0.019	0.011	0.062	23.935	26.489	0.083	0.127	7.667	97.376	0.174382
PSV 13	0.015	39.095	0.09	0.007	0.036	0.084	23.508	26.315	0.094	0.078	7.652	96.974	0.17505
*The following crystals were used as the standards: one PETJ crystal for K, Ca and Ti; one LIFH crystal for La, Ce, Mn and Fe; one TAP crystal for Na, Mg, Al, and Si. *The standards used were albite for Na, diopside for Si, Ca, Mg, haematite for Fe, synthetic TiO2 for Ti, orthoclase for K, synthetic Al2O3 for Al, synthetic MnO for Mn, synthetic LaPO4 for La and synthetic CePO4 for Ce.

## Sheet: Trace Element
Table S1-2 The representative compositions of PSV epidote (Trace element concentrations in ppm)
Element	PSV-LA-1	PSV-LA-2	PSV-LA-3	PSV-LA-4	PSV-LA-5	PSV-LA-6	PSV-LA-7	PSV-LA-8	PSV-LA-9	PSV-LA-10	PSV-LA-11	PSV-LA-12	PSV-LA-13	PSV-LA-14	PSV-LA-15	PSV-LA-16	PSV-LA-17	PSV-LA-18	PSV-LA-19	PSV-LA-20	PSV-SA-21	PSV-SA-22	PSV-SA-23	PSV-SA-24	PSV-SA-25	PSV-SA-26	PSV-SA-27	PSV-SA-28	PSV-SA-29	PSV-SA-30
Mg	186.33	185.34	319.15	241.97	479.21	225.06	346.65	229.78	283.91	228.64	261.67	275.42	362.08	394.79	296.13	300.91	225.27	360.85	387.31	155.21	461.83	491	339.75	464.59	312.76	367.19	296.5	353.9	307.35	239.45
Si	182300	182300	182300	182300	182300	182300	182300	182300	182300	182300	182300	182300	182300	182300	182300	182300	182300	182300	182300	182300	182300	182300	182300	182300	182300	182300	182300	182300	182300	182300
P	53.15	51.66	51.87	52.56	53.34	51.75	54.69	55.17	57.52	57.23	60.07	60.76	64.41	66.21	68.43	76.39	78.36	85.25	94.27	105.06	104.38	76.44	63.59	59.31	53.81	49.64	48.51	45.18	47.59	42.43
Ca	154682	169041	155391	161189	157361	162210	162550	156283	161848	157798	164149	165433	153983	168347	160908	168026	174962	171228	177100	175901	177803	169948	170865	174034	165261	168146	169662	158031	171092	165891
Sc	20.28	21.84	22.85	21.9	17.52	21.11	21.54	22.59	29.22	26.27	27.13	34.53	28.45	29.89	42.37	33.31	34.55	43.88	37.2	42.15	31.09	29.95	27.63	23.38	23.46	33.24	33.85	32.89	35.47	32.39
Ti	397.3	423.71	437.48	421.25	887.8	828.08	839.57	851.73	421.77	593.75	823.52	397.48	316.37	311.62	388.92	431.81	460.29	368.04	613.45	688.61	320.25	323.62	315.54	397.52	547.1	422.91	416.42	393.76	405.16	544.21
V	349.11	357.83	355.29	350.36	357.05	362.15	365.55	370.96	369.5	369.49	379.72	362.2	339.59	340.67	367.55	356.21	373.05	390.38	397.97	427.6	347.65	342.98	344.4	333.99	334.83	352.22	357.29	344.07	365.97	359.43
Mn	472.74	446.93	429.09	437.52	574.56	584.49	513.3	554.76	437.82	492.41	569.9	428.74	483.2	482.32	404.89	459.63	476.15	418.69	485.77	533.68	477.89	488.48	493.26	417.83	420.87	427.66	406.39	396.79	428.76	461.82
Fe	68300.2	69353.9	70043.7	69067.9	63406.7	65227.1	66113.7	64077.9	69455.2	67567.4	65573.7	70368.9	65219.9	64933	69031.8	65390.7	67994.3	69710.7	70097.2	70990.6	64436.6	64849.3	64424.8	67151.2	62670.4	69339.9	69030.4	67820.4	71610.8	67807.4
Co	0.239	0.307	0.261	0.236	0.313	0.196	0.171	0.333	0.25	0.358	0.272	0.35	0.384	0.415	0.226	0.26	0.28	0.335	0.315	0.277	0.617	0.405	0.353	0.229	0.312	0.386	0.19	0.254	0.302	0.217
Zn	3.12	2.81	2.49	2.13	5.59	3.94	2.01	2.21	2.64	2.85	2.81	2.59	4.08	3.48	3.59	2.16	2.9	3.59	2.64	3.24	5.35	4.26	4.67	2.65	4.46	3.6	3.3	2.86	2.27	2.59
Ga	44.09	41.42	41.46	40.11	38.02	37.68	39.45	39.4	40.65	38.97	38.59	40.66	41.67	42.01	40.4	39.16	39.32	42.14	38.58	39.82	41.09	41.36	41.57	38.93	35.51	40.1	40.52	39.34	41.89	38.54
Rb	bd	bd	bd	bd	bd	bd	bd	bd	bd	bd	bd	bd	bd	bd	bd	bd	bd	bd	bd	bd	bd	bd	bd	bd	bd	bd	bd	bd	bd	bd
Sr	2021.47	2411.49	2511.05	2262.8	1471.16	1553.99	1540.48	1519.81	2372.86	1990.86	1589.2	2126.38	1661.19	1685.49	2330.63	1552.42	1599.5	2315.55	1627.63	1816.04	1789.74	1701.5	1699.1	1521.78	1399.52	2363.38	2618.32	2446.06	2486.12	2095.18
Y	37.24	36.99	34.4	34.56	30.77	35.67	35.39	33.63	35.25	33.78	36	40.75	41.78	45.17	41.48	40.38	43.52	45.41	49.67	47.46	45.61	42.02	42.48	44.07	39.57	38.33	37.98	36.52	38.14	37.51
Zr	16.8	22.86	22.41	23.6	19.97	18.79	17.9	17.54	22.63	19.46	18.46	18.57	5.73	6.22	18.19	9.15	9.24	14.82	15	14.26	6.32	5.77	6.06	11.73	14.63	15.89	17.49	17.49	18.34	18.41
Nb	0.076	0.056	0.0406	0.015	0.094	0.053	0.052	0.063	0.137	0.097	0.073	0.23	0.064	0.083	0.14	bd	0.063	0.117	0.062	0.544	0.927	0.041	0.112	0.186	0.101	0.105	0.0278	0.348	0.0108	0.048
Mo	bd	0.038	0.013	bd	0.019	0.176	0.056	bd	bd	bd	0.072	0.06	bd	0.017	0.048	0.062	0.04	0.064	0.047	0.057	bd	bd	bd	bd	0.175	0.012	0.024	bd	0.048	0.021
Ba	14.61	13.62	15.84	14.48	12.49	12.41	13.11	12.23	13.49	12.97	12.5	13.36	13.54	13.44	15.87	13.31	13.77	15.73	12.78	14.03	15.7	13.09	13.87	10.78	11.7	23.69	28.09	24.79	16.93	13.34
Pb	23.65	21.36	21.6	20.67	25.6	26.96	27.24	25.73	19.99	23.6	25.5	19.07	24.51	25.24	19.71	24.38	26.74	21.92	23.99	27.49	26.04	25.15	25.21	20.57	21.07	25.68	25.02	22.94	22.84	23.79
Th	4.02	3.29	2.46	2.82	3.78	9.29	8.22	12.49	9.17	15.27	28.07	18.62	25.43	20.67	18.42	27.82	31.46	24.78	25.88	39.69	23.46	25.55	28.06	13.21	15.49	27.88	16.29	16.45	20.31	25.85
U	5.55	5.34	4.93	4.64	4.76	5.18	5.44	5.34	5.04	5.23	5.49	5.54	5.61	5.94	6.33	4.96	5.1	6.35	7.15	7.59	6.27	5.97	5.9	5.41	4.74	6.85	6.41	6.06	6.3	6.42
La	94.38	93.86	78.72	85.48	66.45	118.9	123.73	139.44	155.51	170.32	197.09	211.61	206.25	170.45	205.8	161.92	178.46	224.17	190.24	245.53	187.19	200.1	218.67	141.43	153.8	234.92	209.32	205.9	227.47	223.22
Ce	180.14	170.92	145.97	155.75	144.18	258.13	252.27	287.08	263.26	313.74	392.79	349.51	398.34	330.36	335.65	315.73	349.6	375.2	371.97	487.78	366.9	392.75	434.48	262.54	297.03	411.74	352.55	346.92	376.74	391.05
Pr	18.96	17.44	14.91	15.83	15.92	27.29	26.26	28.75	24.66	30.5	37.38	31.44	40.06	33.55	30.47	31.25	34.46	35.02	35.87	46.85	35.52	37.54	42.25	25.2	27.79	37.4	31.56	30.73	33.81	35.18
Nd	67.47	60.85	51.81	55.74	58.81	97.02	90	99.11	83.09	101.41	124.51	101.71	135.74	114.98	101.52	103.83	119.93	117.8	121.19	162.38	126.46	134.3	142.93	88.27	94.12	121.2	105.67	102.94	110.5	122.4
Sm	12.57	11.67	9.64	10.3	11.33	17.76	16.67	16.61	13.52	16.91	18.86	16.28	22.2	20.8	16.89	17.44	19.32	20.94	20.15	25.27	21.38	22.4	23.99	14.18	15.49	18.68	16.72	16	16.53	18.32
Eu	3.61	3.39	2.9	3.21	3.25	4.64	3.97	4.23	3.43	3.93	4.61	3.93	5.57	5.34	4.06	4.85	5.22	5.28	5.27	6.44	5.29	5.43	5.68	3.74	3.74	4.34	4.23	3.97	3.95	4.39
Gd	9.95	9.08	8.14	8.99	9.09	12.08	11.18	11.43	9.76	11.02	11.72	10.9	15.4	14.92	12.18	12.09	15.42	14.72	15.53	16.52	16	15.26	15.94	11.13	10.91	12.81	11.96	12.01	11.47	12.73
Tb	1.437	1.322	1.208	1.26	1.2	1.655	1.538	1.355	1.447	1.378	1.494	1.583	1.964	1.918	1.582	1.896	1.954	2.012	1.983	2.39	2.04	2.03	1.999	1.714	1.497	1.678	1.545	1.572	1.569	1.639
Dy	7.77	7.2	6.66	7.15	6.49	8.41	7.95	8.12	7.61	8.04	8.03	8.73	10.42	10.57	9.54	9.2	10.21	10.98	11.06	11.51	11.53	11.07	10.53	9.37	8.71	8.78	8.88	8.28	8.7	8.96
Ho	1.43	1.45	1.288	1.379	1.133	1.41	1.344	1.327	1.241	1.201	1.382	1.457	1.78	1.77	1.722	1.601	1.826	1.773	1.925	2.17	1.713	1.712	1.82	1.812	1.523	1.671	1.49	1.504	1.624	1.556
Er	3.44	3.37	3.25	3.37	2.85	3.33	3.43	3.39	3.43	3.3	3.39	4.09	4.16	3.87	3.86	3.41	4.18	4.35	4.97	4.72	4.11	4.33	4.07	4.78	4.08	4.02	3.91	3.9	4.01	3.99
Tm	0.384	0.421	0.414	0.405	0.461	0.461	0.352	0.421	0.415	0.39	0.441	0.447	0.431	0.471	0.463	0.466	0.54	0.585	0.65	0.564	0.562	0.479	0.5	0.549	0.479	0.53	0.487	0.498	0.536	0.447
Yb	2.23	2.87	2.46	2.61	2.35	2.63	2.65	2.61	2.21	2.63	2.48	2.93	2.59	2.23	2.94	2.75	2.56	2.91	3.06	3.17	2.27	2.18	2.38	3.51	2.75	2.47	2.66	2.56	2.63	2.75
Lu	0.341	0.313	0.361	0.328	0.338	0.352	0.383	0.367	0.353	0.356	0.423	0.337	0.307	0.341	0.331	0.412	0.393	0.321	0.432	0.362	0.342	0.3	0.401	0.349	0.309	0.406	0.376	0.389	0.376	0.331
Hf	0.95	1.37	1.2	1.18	1.27	1.28	1.34	1.26	1.23	1.24	1.24	1.1	0.398	0.572	1.23	0.49	0.562	1.05	1.13	0.75	0.464	0.275	0.347	0.74	0.96	1.11	1.18	1.09	1.3	1.27
Ta	0.0123	0.0176	0.0207	0.0212	0.0065	0.0086	0.0068	0.0367	0.023	0.0186	0.0446	0.0074	0.045	0.0155	0.0159	0.0133	0.027	0.0092	0.049	0.048	0.037	0.0252	0.031	0.0138	0.0335	0.012	0.0116	0.0153	0.0116	0.0121
W	bd	0.0079	bd	0.0072	0.08	bd	0.056	bd	0.059	bd	bd	bd	0.0102	0.0107	0.071	bd	0.0063	0.0068	0.097	0.11	0.137	bd	0.0052	bd	0.0203	bd	0.052	bd	0.0104	bd
bd: below the detection
Element	BIR-1G-1	BIR-1G-2	BIR-1G-3
Mg	57490.9	57745	56230.3
Si	222032	222032	222032
P	115.3	98.31	82.84
Ca	96826.1	87704.1	93625.1
Sc	50.7	44.8	42.99
Ti	5454.14	5428.89	5452.3
V	354.59	350.1	336.74
Mn	1409.4	1391.42	1368.5
Fe	79353.6	80387.7	77996.6
Co	56.08	55.46	54.19
Zn	95.71	86.23	82.71
Ga	16.49	17.18	16.16
Rb	0.2	0.214	0.159
Sr	110.24	105.92	107.85
Y	14.3	13.43	12.66
Zr	13.92	13.61	12.92
Nb	0.435	0.482	0.551
Mo	0.092	0.0095	0.088
Ba	6.17	6.13	6.64
Pb	4.66	4.31	4.41
Th	0.0315	0.0283	0.0227
U	0.019	0.0165	0.0147
La	0.697	0.552	0.771
Ce	1.862	1.907	1.889
Pr	0.181	0.27	0.43
Nd	2.2	2.25	2.21
Sm	1.1	1.13	1.11
Eu	0.48	0.518	0.487
Gd	1.93	1.74	1.66
Tb	0.297	0.339	0.326
Dy	2.85	2.5	2.33
Ho	0.535	0.497	0.537
Er	1.63	1.573	1.53
Tm	0.22	0.244	0.26
Yb	1.52	1.44	1.3
Lu	0.237	0.195	0.209
Hf	0.665	0.614	0.6
Ta	0.0478	0.0355	0.0395
W	0.056	0.003	0.026
